# Supplementary material
Source: PubMed Central journal article supplement (PMC4141655)
Supplement: NIHMS536081-supplement-2.pdf [file NIHMS536081-supplement-2.pdf]

|                 | KFSYSCC (n=290) | TCGA CRC (n=206) | Khambata-Ford (n=68) | Gaedcke (n=65) |
|-----------------|-----------------|------------------|----------------------|----------------|
| kras mut status | 115 (39%)       | 88 (42%)         | 26 (39%)             | 30 (46%)       |
| Stage           |                 |                  |                      |                |
| I               | 30 (10%)        | 45 (22%)         | 0                    | NA             |
| II              | 80 (27%)        | 74 (36%)         | 0                    | NA             |
| III             | 111 (38%)       | 52 (25%)         | 0                    | NA             |
| IV              | 69 (23%)        | 33 (16%)         | 68 (100%)            | NA             |
| Platform        | U133-2.0+       | Agilent /RNAseq  | U133A                | Agilent        |

**Table 1:** Characteristics of the 4 CRC datasets used in training (KFSYSCC) and validation of the RAS model.
