# Supplementary material
Source: PubMed Central journal article supplement (PMC4141655)
Supplement: NIHMS536081-supplement-3.pdf [file NIHMS536081-supplement-3.pdf]

|                         | Khambata-Ford (n=68) | INSERM (n=85)    |
|-------------------------|----------------------|------------------|
| KRAS mutant             | 26 (39%)             | 0%               |
| RECIST                  |                      |                  |
| PD                      | 36 (52%)             | 3 (3%)           |
| SD                      | 17 (25%)             | 37 (44%)         |
| PR                      | 4 (6%)               | 32 (38%)         |
| CR                      | 0                    | 13 (15%)         |
| UTD                     | 11                   | 0                |
| PFS (median, 95%) weeks | 8.5 [4.4 - 35.0]     | 28.8 [ 8 - 64.3] |

**STable 2:** Characteristics of the 2 metastatic CRC datasets used for evaluation of prediction of PFS.
