# Supplementary material
Source: PubMed Central journal article supplement (PMC4141655)
Supplement: NIHMS536081-supplement-4.pdf [file NIHMS536081-supplement-4.pdf]

| <b>Gene</b> | <b>Effect Score</b> | <b>Frequency</b> |
|-------------|---------------------|------------------|
| NPTX2       | -0.108179768        | 1                |
| LMAN2L      | -0.08869034         | 1                |
| IL33        | 0.088051564         | 1                |
| DUSP6       | 0.068245711         | 1                |
| MYL4        | 0.061279165         | 1                |
| PHLDA1      | 0.054238278         | 1                |
| EYA2        | -0.05240332         | 1                |
| PHIP        | -0.051786225        | 1                |
| KCNN4       | 0.048324319         | 1                |
| HSPB3       | -0.047323645        | 1                |
| SKP1        | 0.043589364         | 1                |
| LAMC2       | 0.040225711         | 1                |
| HOXB6       | 0.085131383         | 0.99             |
| SKAP1       | 0.077376312         | 0.99             |
| RNF39       | 0.049843292         | 0.99             |
| SLC17A1     | -0.0453273          | 0.99             |
| BANP        | -0.041791038        | 0.99             |
| TBXAS1      | 0.079946913         | 0.98             |
| KCNG1       | -0.074334211        | 0.98             |
| TRPV1       | -0.053983018        | 0.98             |
| ZBTB40      | -0.050504025        | 0.98             |
| EDEM2       | -0.045742123        | 0.98             |
| SNX3        | -0.045435859        | 0.98             |
| NINL        | -0.042550058        | 0.98             |
| HDLBP       | -0.041489146        | 0.98             |
| MYBPC1      | 0.054526844         | 0.97             |
| S100A6      | 0.052049184         | 0.97             |
| SYNJ1       | -0.046537355        | 0.97             |
| GABBR1      | 0.053158473         | 0.96             |
| APOBEC1     | 0.049071321         | 0.96             |
| FAM60A      | 0.043233777         | 0.96             |
| ZBTB48      | -0.038884738        | 0.96             |
| HOXB7       | 0.050118277         | 0.95             |
| CLEC10A     | 0.041520847         | 0.95             |
| SHB         | 0.0380573           | 0.95             |
| SLC4A10     | 0.10217559          | 0.94             |
| CD1E        | 0.097763475         | 0.94             |
| CRCT1       | 0.094443102         | 0.94             |

|          |              |      |
|----------|--------------|------|
| ASGR1    | 0.049493718  | 0.94 |
| TSPAN31  | 0.04827791   | 0.94 |
| SYCP1    | -0.047319644 | 0.94 |
| EREG     | -0.045771017 | 0.94 |
| CDKAL1   | -0.038632274 | 0.94 |
| BNC1     | -0.098909666 | 0.93 |
| MFSD11   | -0.039806112 | 0.93 |
| C10orf68 | 0.077100155  | 0.92 |
| KRT81    | 0.066899131  | 0.92 |
| LRRC6    | 0.044238403  | 0.92 |
| IFNGR2   | 0.043186485  | 0.92 |
| KRT24    | 0.115943626  | 0.91 |
| STAMBP   | -0.04497981  | 0.91 |
| PRUNE2   | 0.037801957  | 0.91 |
| GABRQ    | -0.049067108 | 0.9  |
| TNNI1    | -0.042090431 | 0.9  |
| CAPN9    | 0.041183017  | 0.9  |

**STable 1:** Top RAS model genes. This tables represents the scoring genes in our model. We performed 100 bootstraps of KFSYSCC data, and computed to statistics for each gene: an "Effect Score" and "Frequency". The "Effect Size" is computed as the average beta coefficient across the 100 bootstraps assigned to a gene, multiplied by the standard deviation of the gene expression value. The frequency is computed as how many of the beta coefficient was non-zero across the 100 bootstraps. A list of 55 genes was a result of selecting all genes that had a frequency of at least 60%, and had an effect score that was greater than 1.5 sd from the distribution of all effect score.



55 top  
of the

ted as  
ned

times  
. This
