# Supplementary material
Source: PubMed Central journal article supplement (PMC4141655)
Supplement: NIHMS536081-supplement-5.pdf [file NIHMS536081-supplement-5.pdf]

|                       |               | N   | %kras mut | AUC  | Sensitivity | Specificity |
|-----------------------|---------------|-----|-----------|------|-------------|-------------|
| CRC                   | KFSYSCC       | 290 |           |      |             |             |
|                       | TCGA CRC      | 206 | 42%       | 0.8  | 0.63        | 0.81        |
|                       | Khambata-Ford | 68  | 39%       | 0.78 | 0.93        | 0.66        |
|                       | Gaedcke       | 65  | 46%       | 0.9  | 0.97        | 0.8         |
| Lung adeno            | TCGA LUAD     | 162 | 28.4      | 0.61 |             |             |
|                       | Battle        | 124 | 19.3      | 0.53 |             |             |
|                       | Wilkerson     | 116 | 17.2      | 0.63 |             |             |
|                       | Chemores      | 110 | 18.2      | 0.68 |             |             |
| Endometrial carcinoma | TCGA UCEC     | 241 | 21.1      | 0.63 |             |             |

**Supplemental Table 4:** Data sets used for evaluation of the colorectal RAS model, and reported AUC in classification of KRAS mutant from wild-type samples. Performance degrades significantly in the non-colorectal cohorts, indicating that the RAS model is optimized for colorectal and not highly generalizable to other disease types.
