# Supplementary material
Source: PubMed Central journal article supplement (PMC4141655)
Supplement: NIHMS536081-supplement-6.pdf [file NIHMS536081-supplement-6.pdf]

STable 5A: univariate analysis

|                       | Progression free survival |         |               | Concordance (se: standard error) index |
|-----------------------|---------------------------|---------|---------------|----------------------------------------|
|                       | Hazard ratio<br>95% CI    | P Value | proportion of |                                        |
| RAS Index Score (RIS) | 2.4<br>1.37-4.23          | 0.0016  | 0.15          | .612 (se=.04)                          |
| KRAS mutation only    | 2.3<br>1.24 - 4.35        | 0.0085  | 0.11          | .56 (se=.038)                          |

STable 5B: multivariate analysis

|                       | Progression free survival |         |               | Concordance (se: standard error) index |
|-----------------------|---------------------------|---------|---------------|----------------------------------------|
|                       | Hazard ratio<br>95% CI    | P Value | proportion of |                                        |
| RAS Index Score (RIS) | 2.0<br>1.03 - 3.83        | .04     |               |                                        |
| KRAS mutation only    | 1.56<br>.76 - 3.20        | .22     |               |                                        |

**Supplementary Table 5:** PFS analysis in Khambata-Ford data set.

STable BA: univariate cox regression analysis of RIS and KRAS mutation status on PFS.

STable 5B: multivariate cox regression analysis including RIS and KRAS mutation status. In this context, RIS remains a significant variable.
