# Supplementary material
Source: PubMed Central journal article supplement (PMC4141655)
Supplement: NIHMS536081-supplement-7.pdf [file NIHMS536081-supplement-7.pdf]

Stable 6

|                       | Progression free survival |         |                |                                        |
|-----------------------|---------------------------|---------|----------------|----------------------------------------|
|                       | Hazard ratio<br>95% CI    | P Value | R <sup>2</sup> | Concordance (se: standard error) index |
| RAS Index Score (RIS) | 2.0<br>2.00 - 15.85       | 7.8e-04 | .115           | .639 (se= .04)                         |

**Supplementary Table 6: PFS analysis within the French cohort da**
